# Supplementary material for: A glimpse of academic staff health behavior on diet type and physical activity at Austrian universities: first findings from the “Sustainably Healthy – From Science 2 Highschool & University” study
Source: PubMed Central journal article supplement (PMC10359429; doi:10.3389/fpubh.2023.1194602), 2023-07-06
Supplement: Data_Sheet_1.pdf [file Data_Sheet_1.pdf]

## *Appendix – Supplementary Material*

### **A Glimpse of Academic Staff Health Behavior on Diet Type and Physical Activity at Austrian Universities: First Findings from the “Sustainably Healthy – From Science 2 Highschool & University” Study**

**Katharina C. Wirnitzer<sup>1,2,3\*</sup>, Mohamad Motevalli<sup>1,2</sup>, Derrick R. Tanous<sup>1,2</sup>, Gerold Wirnitzer<sup>4</sup>, Karl-Heinz Wagner<sup>5</sup>, Manuel Schätzer<sup>6</sup>, Clemens Drenowatz<sup>7</sup>, Armando Cocca<sup>2</sup>, Gerhard Ruedl<sup>2</sup> and Werner Kirschner<sup>2</sup>**

**\* Correspondence:**

Katharina C. Wirnitzer

[katharina.wirnitzer@ph-tirol.ac.at](mailto:katharina.wirnitzer@ph-tirol.ac.at); Tel.: +43(650)5901794; Web: <https://uni.science2.school/en/>

**Appendix Tables A1 – A4**

**Table A1:** Anthropometric Characteristics by federal state and living area in full-time university staff. Values are means  $\pm$  SD and prevalence for body weight categories.

|                      | N          | Age (years)                       | Height (cm)                       | Body Weight (kg)                  | BMI (kg/m <sup>2</sup> )         | Overweight/Obesity (%) |
|----------------------|------------|-----------------------------------|-----------------------------------|-----------------------------------|----------------------------------|------------------------|
| <b>Burgenland</b>    | <b>18</b>  | <b>43.0 <math>\pm</math> 10.9</b> | <b>170.3 <math>\pm</math> 6.9</b> | <b>73.3 <math>\pm</math> 19.6</b> | <b>25.2 <math>\pm</math> 6.6</b> | <b>38.9</b>            |
| Urban                | 9          | 45.0 $\pm$ 11.0                   | 168.1 $\pm$ 6.2                   | 68.7 $\pm$ 20.4                   | 24.0 $\pm$ 5.6                   | 33.3                   |
| Rural                | 9          | 41.0 $\pm$ 11.0                   | 172.6 $\pm$ 7.1                   | 77.8 $\pm$ 18.9                   | 26.3 $\pm$ 7.6                   | 44.4                   |
| <b>Carinthia</b>     | <b>8</b>   | <b>50.1 <math>\pm</math> 6.4</b>  | <b>171.2 <math>\pm</math> 9.1</b> | <b>71.4 <math>\pm</math> 13.8</b> | <b>24.0 <math>\pm</math> 3.4</b> | <b>25.0</b>            |
| Urban                | 6          | 52.5 $\pm$ 5.1                    | 168.7 $\pm$ 8.1                   | 68.8 $\pm$ 15.2                   | 24.0 $\pm$ 4.0                   | 33.3                   |
| Rural                | 2          | 43.0 $\pm$ 4.2                    | 181.5 $\pm$ 2.1                   | 71.4 $\pm$ 4.2                    | 24.0 $\pm$ 0.7                   | 0.0                    |
| <b>Lower Austria</b> | <b>30</b>  | <b>48.6 <math>\pm</math> 10.4</b> | <b>176.3 <math>\pm</math> 9.4</b> | <b>73.4 <math>\pm</math> 15.5</b> | <b>23.5 <math>\pm</math> 4.2</b> | <b>30.0</b>            |
| Urban                | 7          | 51.0 $\pm$ 3.5                    | 174.7 $\pm$ 7.1                   | 67.5 $\pm$ 9.7                    | 22.0 $\pm$ 2.1                   | 0.0                    |
| Rural                | 23         | 47.9 $\pm$ 11.7                   | 176.8 $\pm$ 10.0                  | 75.2 $\pm$ 16.7                   | 24.0 $\pm$ 4.6                   | 39.1                   |
| <b>Salzburg</b>      | <b>36</b>  | <b>47.8 <math>\pm</math> 9.7</b>  | <b>176.0 <math>\pm</math> 9.3</b> | <b>76.9 <math>\pm</math> 13.3</b> | <b>24.8 <math>\pm</math> 3.9</b> | <b>38.9</b>            |
| Urban                | 26         | 48.0 $\pm$ 10.6                   | 175.8 $\pm$ 9.9                   | 76.5 $\pm$ 14.5                   | 24.7 $\pm$ 4.2                   | 34.6                   |
| Rural                | 10         | 47.2 $\pm$ 7.1                    | 176.7 $\pm$ 7.7                   | 78.1 $\pm$ 9.8                    | 25.1 $\pm$ 3.1                   | 50.0                   |
| <b>Styria</b>        | <b>35</b>  | <b>49.4 <math>\pm</math> 10.4</b> | <b>170.9 <math>\pm</math> 7.2</b> | <b>69.3 <math>\pm</math> 9.8</b>  | <b>23.7 <math>\pm</math> 2.8</b> | <b>22.9</b>            |
| Urban                | 25         | 51.2 $\pm$ 9.7                    | 170.8 $\pm$ 7.1                   | 68.8 $\pm$ 9.5                    | 23.6 $\pm$ 2.6                   | 28.0                   |
| Rural                | 10         | 44.9 $\pm$ 11.5                   | 171.0 $\pm$ 7.8                   | 70.4 $\pm$ 11.0                   | 24.1 $\pm$ 3.2                   | 10.0                   |
| <b>Tyrol</b>         | <b>189</b> | <b>47.3 <math>\pm</math> 9.8</b>  | <b>174.3 <math>\pm</math> 9.5</b> | <b>73.4 <math>\pm</math> 14.1</b> | <b>24.1 <math>\pm</math> 3.8</b> | <b>31.7</b>            |
| Urban                | 125        | 46.7 $\pm$ 10.1                   | 173.7 $\pm$ 9.9                   | 72.9 $\pm$ 13.9                   | 24.1 $\pm$ 3.9                   | 31.2                   |
| Rural                | 64         | 48.5 $\pm$ 9.3                    | 175.4 $\pm$ 8.5                   | 74.4 $\pm$ 14.6                   | 24.0 $\pm$ 3.7                   | 32.8                   |
| <b>Upper Austria</b> | <b>75</b>  | <b>49.3 <math>\pm</math> 8.8</b>  | <b>171.9 <math>\pm</math> 9.2</b> | <b>71.1 <math>\pm</math> 13.7</b> | <b>24.0 <math>\pm</math> 3.6</b> | <b>33.3</b>            |
| Urban                | 42         | 48.1 $\pm$ 9.8                    | 172.1 $\pm$ 8.4                   | 69.9 $\pm$ 14.2                   | 23.5 $\pm$ 3.8                   | 28.6                   |
| Rural                | 33         | 50.7 $\pm$ 7.5                    | 171.8 $\pm$ 10.2                  | 72.7 $\pm$ 13.0                   | 24.6 $\pm$ 3.4                   | 39.4                   |
| <b>Vienna</b>        | <b>279</b> | <b>44.4 <math>\pm</math> 11.3</b> | <b>175.8 <math>\pm</math> 8.9</b> | <b>75.7 <math>\pm</math> 13.8</b> | <b>24.4 <math>\pm</math> 3.4</b> | <b>36.6</b>            |
| Urban                | 252        | 44.2 $\pm$ 11.3                   | 175.7 $\pm$ 8.8                   | 75.7 $\pm$ 14.1                   | 24.4 $\pm$ 3.4                   | 35.7                   |
| Rural                | 27         | 46.4 $\pm$ 11.3                   | 176.9 $\pm$ 9.9                   | 76.2 $\pm$ 11.8                   | 24.3 $\pm$ 4.0                   | 44.4                   |
| <b>Vorarlberg</b>    | <b>16</b>  | <b>50.1 <math>\pm</math> 11.4</b> | <b>173.3 <math>\pm</math> 6.7</b> | <b>74.5 <math>\pm</math> 16.3</b> | <b>24.8 <math>\pm</math> 5.1</b> | <b>37.5</b>            |
| Urban                | 7          | 51.4 $\pm$ 10.7                   | 172.7 $\pm$ 7.3                   | 73.8 $\pm$ 15.3                   | 24.7 $\pm$ 4.4                   | 42.9                   |
| Rural                | 9          | 49.1 $\pm$ 12.4                   | 173.7 $\pm$ 6.7                   | 75.1 $\pm$ 18.0                   | 24.9 $\pm$ 5.8                   | 33.3                   |

**Table A2:** Anthropometric Characteristics by federal state and living area in part time staff. Values are means  $\pm$  SD and prevalence for body weight categories.

|                      | N     | Age (years)     | Height (cm)      | Body Weight (kg) | BMI (kg/m <sup>2</sup> ) | Overweight/Obesity (%) |
|----------------------|-------|-----------------|------------------|------------------|--------------------------|------------------------|
| <b>Burgenland</b>    | 22    | 45.3 $\pm$ 11.6 | 174.8 $\pm$ 10.0 | 72.7 $\pm$ 17.1  | 23.5 $\pm$ 3.4           | 40.9                   |
| Urban                | 10    | 46.3 $\pm$ 11.5 | 172.7 $\pm$ 9.3  | 67.1 $\pm$ 12.9  | 22.3 $\pm$ 2.6           | 30.0                   |
| Rural                | 12    | 44.5 $\pm$ 12.1 | 176.6 $\pm$ 10.6 | 77.4 $\pm$ 19.3  | 24.5 $\pm$ 3.7           | 50.0                   |
| <b>Carinthia</b>     | 4     | 51.7 $\pm$ 4.6  | 161.3 $\pm$ 1.2  | 75.2 $\pm$ 32.3  | 29.0 $\pm$ 12.9          | 50.0                   |
| Urban                | 4     | 51.7 $\pm$ 4.6  | 161.3 $\pm$ 1.2  | 75.2 $\pm$ 32.3  | 29.0 $\pm$ 12.9          | 50.0                   |
| Rural                | N / A | N / A           | N / A            | N / A            | N / A                    | N / A                  |
| <b>Lower Austria</b> | 8     | 49.1 $\pm$ 9.8  | 168.8 $\pm$ 8.6  | 70.9 $\pm$ 12.5  | 25.0 $\pm$ 4.6           | 37.5                   |
| Urban                | 3     | 53.0 $\pm$ 11.5 | 166.7 $\pm$ 1.2  | 70.0 $\pm$ 17.1  | 25.1 $\pm$ 5.8           | 33.3                   |
| Rural                | 5     | 46.8 $\pm$ 9.1  | 170.0 $\pm$ 11.1 | 71.4 $\pm$ 11.3  | 24.8 $\pm$ 4.6           | 40.0                   |
| <b>Salzburg</b>      | 31    | 48.6 $\pm$ 11.2 | 172.5 $\pm$ 8.9  | 71.1 $\pm$ 14.4  | 23.9 $\pm$ 4.3           | 29.0                   |
| Urban                | 24    | 49.8 $\pm$ 11.9 | 171.8 $\pm$ 8.5  | 70.5 $\pm$ 14.6  | 23.7 $\pm$ 3.8           | 33.3                   |
| Rural                | 7     | 44.4 $\pm$ 7.2  | 174.7 $\pm$ 10.4 | 73.4 $\pm$ 14.8  | 24.3 $\pm$ 6.3           | 14.3                   |
| <b>Styria</b>        | 26    | 47.3 $\pm$ 10.1 | 169.9 $\pm$ 8.4  | 67.0 $\pm$ 12.4  | 23.0 $\pm$ 3.9           | 30.8                   |
| Urban                | 19    | 48.0 $\pm$ 10.6 | 169.4 $\pm$ 8.0  | 66.8 $\pm$ 12.6  | 23.1 $\pm$ 4.3           | 31.6                   |
| Rural                | 7     | 45.4 $\pm$ 9.4  | 171.4 $\pm$ 9.9  | 67.7 $\pm$ 12.3  | 22.8 $\pm$ 2.8           | 28.6                   |
| <b>Tyrol</b>         | 92    | 42.3 $\pm$ 13.2 | 171.4 $\pm$ 8.3  | 68.6 $\pm$ 11.2  | 23.3 $\pm$ 3.8           | 26.1                   |
| Urban                | 49    | 39.5 $\pm$ 13.7 | 170.7 $\pm$ 7.8  | 67.0 $\pm$ 11.9  | 22.9 $\pm$ 3.5           | 20.4                   |
| Rural                | 43    | 45.5 $\pm$ 11.9 | 172.2 $\pm$ 8.8  | 70.3 $\pm$ 11.0  | 23.8 $\pm$ 4.1           | 32.6                   |
| <b>Upper Austria</b> | 45    | 48.2 $\pm$ 10.1 | 171.9 $\pm$ 7.9  | 70.0 $\pm$ 12.8  | 23.6 $\pm$ 3.2           | 26.7                   |
| Urban                | 21    | 46.9 $\pm$ 9.8  | 170.9 $\pm$ 8.1  | 70.2 $\pm$ 14.6  | 23.9 $\pm$ 3.8           | 33.3                   |
| Rural                | 24    | 49.3 $\pm$ 10.4 | 172.8 $\pm$ 7.7  | 69.9 $\pm$ 11.3  | 23.3 $\pm$ 2.7           | 20.8                   |
| <b>Vienna</b>        | 123   | 47.2 $\pm$ 15.0 | 174.7 $\pm$ 8.3  | 72.0 $\pm$ 14.2  | 23.4 $\pm$ 3.5           | 26.8                   |
| Urban                | 112   | 47.3 $\pm$ 15.2 | 174.8 $\pm$ 8.2  | 72.0 $\pm$ 14.1  | 23.4 $\pm$ 3.5           | 25.9                   |
| Rural                | 11    | 46.0 $\pm$ 13.7 | 173.8 $\pm$ 9.6  | 72.1 $\pm$ 15.7  | 23.6 $\pm$ 3.5           | 36.4                   |
| <b>Vorarlberg</b>    | 4     | 53.5 $\pm$ 11.8 | 173.5 $\pm$ 12.0 | 79.3 $\pm$ 15.8  | 26.1 $\pm$ 2.6           | 50.0                   |
| Urban                | N / A | N / A           | N / A            | N / A            | N / A                    | N / A                  |
| Rural                | 4     | 53.5 $\pm$ 11.8 | 173.5 $\pm$ 12.0 | 79.3 $\pm$ 15.8  | 26.1 $\pm$ 2.6           | 50.0                   |

**Table A3:** Health behavior by federal state and living area in full time staff. Values are prevalences (%) as well as mean  $\pm$  SD for days with PA – physical activity, sports & exercise.

|                      | N          | Leisure time PA (%) | Club sports (%) | PA/Sport days per week* (mean $\pm$ SD) | Daily Fruits (%) | Daily Veggies (%) | Fluid intake >2L/day (%) | Water as most common fluid (%) | Vegetarian /Vegan (%) | Alcohol (%) | Smoking (%) |
|----------------------|------------|---------------------|-----------------|-----------------------------------------|------------------|-------------------|--------------------------|--------------------------------|-----------------------|-------------|-------------|
| <b>Burgenland</b>    | <b>18</b>  | <b>88.9</b>         | <b>16.7</b>     | <b>3.3 <math>\pm</math> 1.1</b>         | <b>50.0</b>      | <b>77.8</b>       | <b>55.6</b>              | <b>72.2</b>                    | <b>16.7</b>           | <b>72.2</b> | <b>22.2</b> |
| Urban                | 9          | 88.9                | 11.1            | 3.5 $\pm$ 1.1                           | 55.6             | 88.9              | 55.6                     | 67.7                           | 22.2                  | 66.7        | 22.2        |
| Rural                | 9          | 88.9                | 22.2            | 3.1 $\pm$ 1.1                           | 44.4             | 66.7              | 55.6                     | 77.8                           | 11.1                  | 77.8        | 22.2        |
| <b>Carinthia</b>     | <b>8</b>   | <b>100</b>          | <b>25.0</b>     | <b>3.9 <math>\pm</math> 1.9</b>         | <b>87.5</b>      | <b>62.5</b>       | <b>62.5</b>              | <b>62.5</b>                    | <b>12.5</b>           | <b>50.0</b> | <b>0.0</b>  |
| Urban                | 6          | 100                 | 33.3            | 3.2 $\pm$ 1.5                           | 83.3             | 83.3              | 50.0                     | 66.7                           | 16.7                  | 33.3        | 0.0         |
| Rural                | 2          | 100                 | 0.0             | 6.0 $\pm$ 1.4                           | 100              | 0.0               | 100                      | 50.0                           | 0.0                   | 100         | 0.0         |
| <b>Lower Austria</b> | <b>30</b>  | <b>83.3</b>         | <b>26.7</b>     | <b>3.9 <math>\pm</math> 2.1</b>         | <b>66.7</b>      | <b>70.0</b>       | <b>40.0</b>              | <b>76.7</b>                    | <b>6.7</b>            | <b>60.0</b> | <b>16.7</b> |
| Urban                | 7          | 85.7                | 28.6            | 4.3 $\pm$ 1.6                           | 71.4             | 42.9              | 42.9                     | 71.4                           | 0.0                   | 57.1        | 14.3        |
| Rural                | 23         | 82.6                | 26.1            | 3.7 $\pm$ 2.2                           | 65.2             | 78.3              | 39.1                     | 78.3                           | 8.7                   | 60.9        | 17.4        |
| <b>Salzburg</b>      | <b>36</b>  | <b>80.6</b>         | <b>8.3</b>      | <b>3.4 <math>\pm</math> 1.6</b>         | <b>61.1</b>      | <b>77.8</b>       | <b>41.7</b>              | <b>75.0</b>                    | <b>13.9</b>           | <b>72.2</b> | <b>5.6</b>  |
| Urban                | 26         | 80.8                | 7.7             | 3.2 $\pm$ 1.6                           | 57.7             | 76.9              | 38.5                     | 76.9                           | 11.5                  | 76.9        | 7.7         |
| Rural                | 10         | 80.0                | 10.0            | 3.9 $\pm$ 1.6                           | 70.0             | 80.0              | 50.0                     | 70.0                           | 20.0                  | 60.0        | 0.0         |
| <b>Styria</b>        | <b>35</b>  | <b>80.0</b>         | <b>25.7</b>     | <b>3.5 <math>\pm</math> 1.5</b>         | <b>68.6</b>      | <b>82.9</b>       | <b>40.0</b>              | <b>82.9</b>                    | <b>17.1</b>           | <b>71.4</b> | <b>5.7</b>  |
| Urban                | 25         | 76.0                | 24.0            | 3.6 $\pm$ 1.3                           | 68.0             | 80.0              | 44.0                     | 80.0                           | 16.0                  | 68.0        | 4.0         |
| Rural                | 10         | 90.0                | 30.0            | 3.2 $\pm$ 1.8                           | 70.0             | 90.0              | 30.0                     | 90.0                           | 20.0                  | 80.0        | 10.0        |
| <b>Tyrol</b>         | <b>189</b> | <b>92.6</b>         | <b>19.6</b>     | <b>3.1 <math>\pm</math> 1.6</b>         | <b>63.5</b>      | <b>79.9</b>       | <b>36.0</b>              | <b>72.5</b>                    | <b>12.7</b>           | <b>73.5</b> | <b>13.2</b> |
| Urban                | 125        | 92.0                | 20.0            | 3.0 $\pm$ 1.6                           | 65.6             | 75.2              | 36.8                     | 72.8                           | 14.4                  | 73.6        | 11.2        |
| Rural                | 64         | 93.8                | 18.8            | 3.3 $\pm$ 1.6                           | 59.4             | 89.1              | 34.4                     | 71.9                           | 9.4                   | 73.4        | 17.2        |
| <b>Upper Austria</b> | <b>75</b>  | <b>90.7</b>         | <b>20.0</b>     | <b>3.1 <math>\pm</math> 1.5</b>         | <b>65.3</b>      | <b>82.7</b>       | <b>44.0</b>              | <b>70.7</b>                    | <b>13.4</b>           | <b>66.7</b> | <b>9.3</b>  |
| Urban                | 42         | 92.9                | 14.3            | 3.1 $\pm$ 1.6                           | 66.7             | 85.7              | 38.1                     | 76.2                           | 16.7                  | 69.0        | 11.9        |
| Rural                | 33         | 87.9                | 27.3            | 3.1 $\pm$ 1.0                           | 63.6             | 78.8              | 51.5                     | 63.6                           | 9.1                   | 63.6        | 6.1         |
| <b>Vienna</b>        | <b>279</b> | <b>88.9</b>         | <b>20.1</b>     | <b>3.4 <math>\pm</math> 2.0</b>         | <b>60.6</b>      | <b>81.4</b>       | <b>43.7</b>              | <b>75.6</b>                    | <b>15.8</b>           | <b>74.6</b> | <b>14.0</b> |
| Urban                | 252        | 88.9                | 19.0            | 3.4 $\pm$ 1.9                           | 61.5             | 81.0              | 44.4                     | 77.8                           | 16.7                  | 74.6        | 15.5        |
| Rural                | 27         | 88.9                | 29.6            | 2.9 $\pm$ 2.9                           | 51.9             | 85.2              | 37.0                     | 55.6                           | 7.4                   | 74.1        | 0.0         |
| <b>Vorarlberg</b>    | <b>16</b>  | <b>87.5</b>         | <b>12.5</b>     | <b>3.4 <math>\pm</math> 1.3</b>         | <b>50.0</b>      | <b>75.0</b>       | <b>31.3</b>              | <b>87.5</b>                    | <b>18.8</b>           | <b>62.5</b> | <b>6.3</b>  |
| Urban                | 7          | 85.7                | 14.3            | 3.2 $\pm$ 0.4                           | 42.9             | 71.4              | 14.3                     | 71.4                           | 14.3                  | 71.4        | 0.0         |
| Rural                | 9          | 88.9                | 11.1            | 3.6 $\pm$ 1.7                           | 55.6             | 77.8              | 44.4                     | 100                            | 22.2                  | 55.6        | 11.1        |

\* only participants who reported regular PA/sports participation were included.

**Table A4:** Health behavior by federal state and living area part time staff. Values are prevalences (%) as well as mean  $\pm$  SD for days with PA – physical activity, sports & exercise.

|                      | N          | Leisure time PA (%) | Club sports (%) | PA/Sport days per week* (mean $\pm$ SD) | Daily Fruits (%) | Daily Veggies (%) | Fluid intake >2L/day (%) | Water as most common fluid (%) | Vegetarian /Vegan (%) | Alcohol (%) | Smoking (%) |
|----------------------|------------|---------------------|-----------------|-----------------------------------------|------------------|-------------------|--------------------------|--------------------------------|-----------------------|-------------|-------------|
| <b>Burgenland</b>    | <b>22</b>  | <b>90.9</b>         | <b>22.7</b>     | <b>2.8 <math>\pm</math> 0.9</b>         | <b>63.6</b>      | <b>68.2</b>       | <b>40.9</b>              | <b>72.7</b>                    | <b>9.1</b>            | <b>59.1</b> | <b>9.1</b>  |
| Urban                | 10         | 80.0                | 20.0            | 3.0 $\pm$ 0.8                           | 80.0             | 80.0              | 20.0                     | 70.0                           | 10.0                  | 50.0        | 10.0        |
| Rural                | 12         | 100                 | 25.0            | 2.6 $\pm$ 0.9                           | 50.0             | 58.3              | 58.3                     | 75.0                           | 8.3                   | 66.7        | 8.3         |
| <b>Carinthia</b>     | <b>4</b>   | <b>75.0</b>         | <b>0.0</b>      | <b>3.3 <math>\pm</math> 1.5</b>         | <b>75.0</b>      | <b>75.0</b>       | <b>0.0</b>               | <b>50.0</b>                    | <b>0.0</b>            | <b>50.0</b> | <b>0.0</b>  |
| Urban                | 4          | 75.0                | 0.0             | 3.3 $\pm$ 1.5                           | 75.0             | 75.0              | 0.0                      | 50.0                           | 0.0                   | 50.0        | 0.0         |
| Rural                | N / A      | N / A               | N / A           | N / A                                   | N / A            | N / A             | N / A                    | N / A                          | N / A                 | N / A       | N / A       |
| <b>Lower Austria</b> | <b>8</b>   | <b>62.5</b>         | <b>25.0</b>     | <b>3.2 <math>\pm</math> 2.7</b>         | <b>50.0</b>      | <b>87.5</b>       | <b>37.5</b>              | <b>62.5</b>                    | <b>12.5</b>           | <b>75.0</b> | <b>12.5</b> |
| Urban                | 3          | 33.3                | 0.0             | 5.0 $\pm$ N/A                           | 66.7             | 66.7              | 66.7                     | 66.7                           | 33.3                  | 66.7        | 0.0         |
| Rural                | 5          | 80.0                | 40.0            | 2.8 $\pm$ 2.9                           | 40.0             | 100               | 20.0                     | 60.0                           | 0.0                   | 80.0        | 20.0        |
| <b>Salzburg</b>      | <b>31</b>  | <b>87.1</b>         | <b>6.5</b>      | <b>3.6 <math>\pm</math> 1.7</b>         | <b>58.1</b>      | <b>80.6</b>       | <b>32.3</b>              | <b>71.0</b>                    | <b>22.6</b>           | <b>74.2</b> | <b>16.1</b> |
| Urban                | 24         | 83.3                | 4.2             | 3.8 $\pm$ 1.8                           | 62.5             | 79.2              | 25.0                     | 70.8                           | 25.0                  | 70.8        | 20.8        |
| Rural                | 7          | 100                 | 14.3            | 2.9 $\pm$ 1.2                           | 42.9             | 85.7              | 57.1                     | 71.4                           | 14.3                  | 85.7        | 0.0         |
| <b>Styria</b>        | <b>26</b>  | <b>88.5</b>         | <b>23.1</b>     | <b>2.8 <math>\pm</math> 1.3</b>         | <b>57.7</b>      | <b>80.8</b>       | <b>34.6</b>              | <b>73.1</b>                    | <b>19.2</b>           | <b>65.4</b> | <b>7.7</b>  |
| Urban                | 19         | 94.7                | 26.3            | 2.8 $\pm$ 1.4                           | 52.6             | 78.9              | 42.1                     | 84.2                           | 10.5                  | 68.4        | 5.3         |
| Rural                | 7          | 71.4                | 14.3            | 2.6 $\pm$ 0.5                           | 71.4             | 85.7              | 14.3                     | 42.9                           | 42.9                  | 57.1        | 14.3        |
| <b>Tyrol</b>         | <b>92</b>  | <b>94.6</b>         | <b>20.7</b>     | <b>3.6 <math>\pm</math> 1.5</b>         | <b>69.6</b>      | <b>85.9</b>       | <b>33.7</b>              | <b>79.3</b>                    | <b>22.8</b>           | <b>79.3</b> | <b>12.0</b> |
| Urban                | 49         | 93.9                | 20.4            | 3.7 $\pm$ 1.4                           | 69.4             | 87.8              | 32.7                     | 83.7                           | 24.5                  | 81.6        | 14.3        |
| Rural                | 43         | 95.3                | <b>20.9</b>     | 3.5 $\pm$ 1.5                           | 69.8             | 83.7              | 34.9                     | 74.4                           | 20.9                  | 76.7        | 9.3         |
| <b>Upper Austria</b> | <b>45</b>  | <b>84.4</b>         | <b>17.8</b>     | <b>3.5 <math>\pm</math> 1.5</b>         | <b>66.7</b>      | <b>77.8</b>       | <b>26.7</b>              | <b>80.0</b>                    | <b>11.1</b>           | <b>84.4</b> | <b>20.0</b> |
| Urban                | 21         | 85.7                | 14.3            | 3.6 $\pm$ 1.4                           | 71.4             | 81.0              | 28.6                     | 76.2                           | 9.5                   | 81.0        | 19.0        |
| Rural                | 24         | 83.3                | 20.8            | 3.4 $\pm$ 1.6                           | 62.5             | 75.0              | 25.0                     | 83.3                           | 12.5                  | 87.5        | 20.8        |
| <b>Vienna</b>        | <b>123</b> | <b>83.7</b>         | <b>12.2</b>     | <b>3.3 <math>\pm</math> 1.5</b>         | <b>58.5</b>      | <b>74.8</b>       | <b>33.3</b>              | <b>65.0</b>                    | <b>15.5</b>           | <b>78.9</b> | <b>17.1</b> |
| Urban                | 112        | 83.9                | 12.5            | 3.3 $\pm$ 1.5                           | 58.9             | 73.2              | 33.9                     | 65.2                           | 16.1                  | 80.4        | 18.8        |
| Rural                | 11         | 81.8                | 9.1             | 2.7 $\pm$ 1.6                           | 54.5             | 90.9              | 27.3                     | 63.6                           | 9.1                   | 63.6        | 0.0         |
| <b>Vorarlberg</b>    | <b>4</b>   | <b>100</b>          | <b>50.0</b>     | <b>3.8 <math>\pm</math> 2.2</b>         | <b>25.0</b>      | <b>25.0</b>       | <b>0.0</b>               | <b>50.0</b>                    | <b>0.0</b>            | <b>75.0</b> | <b>0.0</b>  |
| Urban                | N / A      | N / A               | N / A           | N / A                                   | N / A            | N / A             | N / A                    | N / A                          | N / A                 | N / A       | N / A       |
| Rural                | 4          | 100                 | 50.0            | 3.8 $\pm$ 2.2                           | 25.0             | 25.0              | 0.0                      | 50.0                           | 0.0                   | 75.0        | 0.0         |

\* only participants who reported regular PA/sports participation were included.
